# Supplementary material for: Isolation of an “Early” Transit Amplifying Keratinocyte Population in Human Epidermis: A Role for the Low Affinity Neurotrophin Receptor CD271
Source: PubMed Central journal article supplement (PMC9806768; doi:10.1093/stmcls/sxac060), 2022-08-29
Supplement: sxac060_suppl_supplementary_material.pdf [file sxac060_suppl_supplementary_material.pdf]

## SUPPLEMENTARY MATERIAL

### Supplementary Figure 1

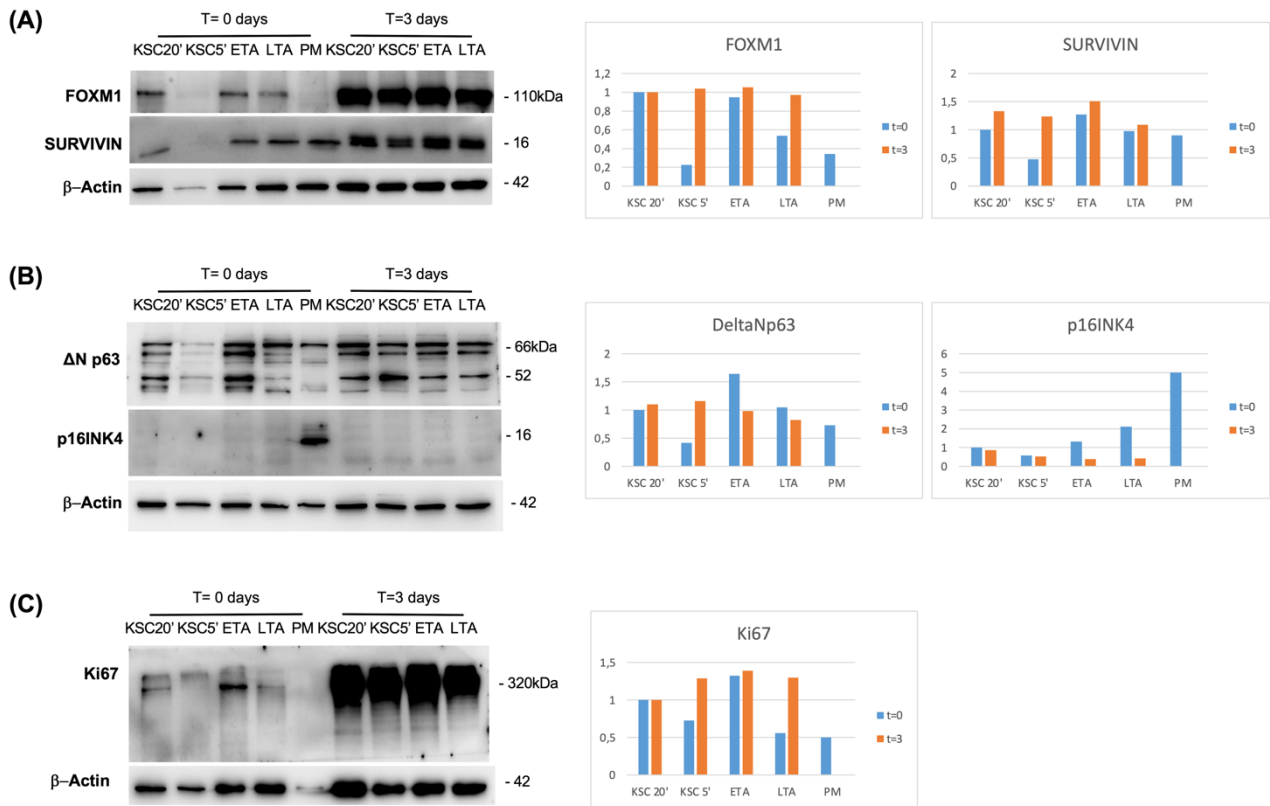

**Supplementary Figure 1. Molecular characterization of freshly isolated keratinocyte subpopulations and after 3 days of culture.** Keratinocytes were isolated based on their ability to adhere to type IV collagen. Subpopulations were obtained: KSC20', KSC5', ETA, LTA, PM. Cells were lysed immediately after the subpopulation isolation (T=0 days) and after 3 days of culture (T=3 days). The expression of FOXM1, Survivin (A),  $\Delta$ Np63 ( $\Delta$ Np63), p16INK4 (B) and Ki67 (C) were analyzed by WB. Actin was used as internal control. Densitometric analysis per each protein was shown, evaluated by Fiji-ImageJ software.
